# Supplementary material for: Human hair keratin for physically transient resistive switching memory devices
Source: Royal Society of Chemistry journal article supplement (doi:10.1039/c8tc05334k), 2019-01-01
Supplement: c8tc05334k1.pdf [file c8tc05334k1.pdf]

## Supporting Information

### Human Hair Keratin for Physically Transient Resistive Switching Memory Devices

Qiqi Lin,<sup>a‡</sup> Shilei Hao,<sup>b‡</sup> Wei Hu,<sup>\*a</sup> Ming Wang,<sup>a</sup> Zhigang Zang,<sup>a</sup> Linna Zhu,<sup>c</sup> Juan Du<sup>d</sup> and Xiaosheng Tang<sup>\*a</sup>

<sup>a</sup> Key Laboratory of Optoelectronic Technology & System of Ministry of Education, College of Optoelectronic Engineering, Chongqing University, Chongqing 400044, China. \*E-mail address: [weihu@cqu.edu.cn](mailto:weihu@cqu.edu.cn) and [xstang@cqu.edu.cn](mailto:xstang@cqu.edu.cn)

<sup>b</sup> Key Laboratory of Biorheological Science and Technology of Ministry of Education, College of Bioengineering, Chongqing University, Chongqing 400030, China.

<sup>c</sup> Chongqing Key Laboratory for Advanced Materials and Technologies of Clean Energy, Faculty of Materials & Energy, Southwest University, Chongqing 400715, China.

<sup>d</sup> State Key Laboratory of High Field Laser Physics, Shanghai Institute of Optics and Fine Mechanics, Chinese Academy of Sciences, Shanghai 201800, China.

‡ Q. Lin and S. Hao contributed equally to this work.

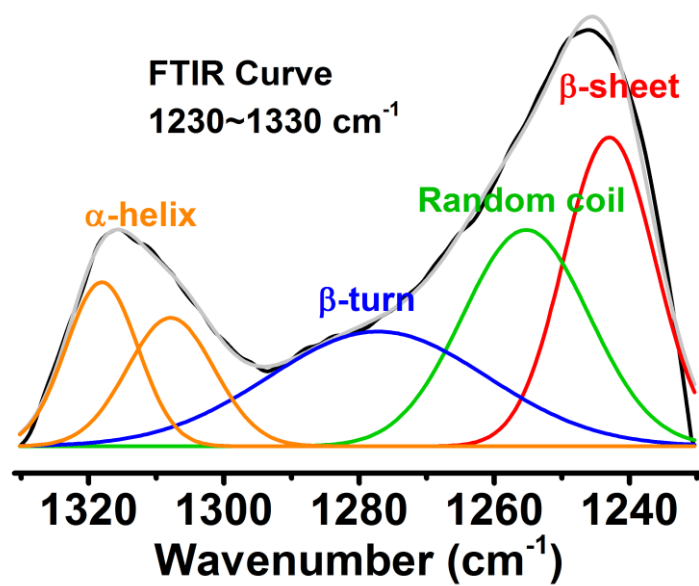

**Figure S1.** FTIR peak resolution of Amide III band spectra regions (1230-1330  $\text{cm}^{-1}$ ).

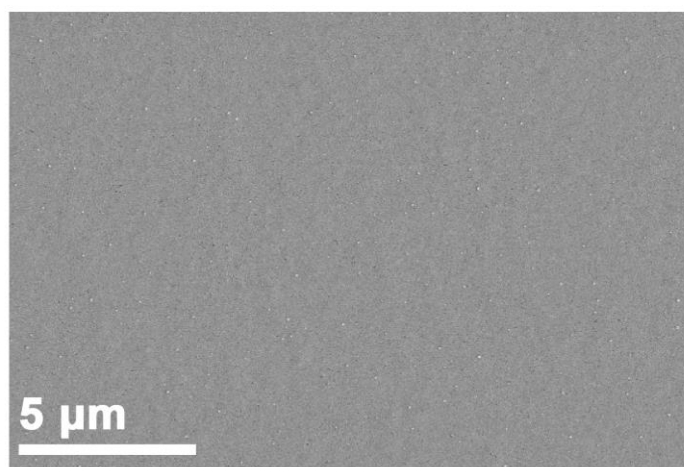

**Figure S2.** Top-view SEM image of the keratin thin films under low magnification.

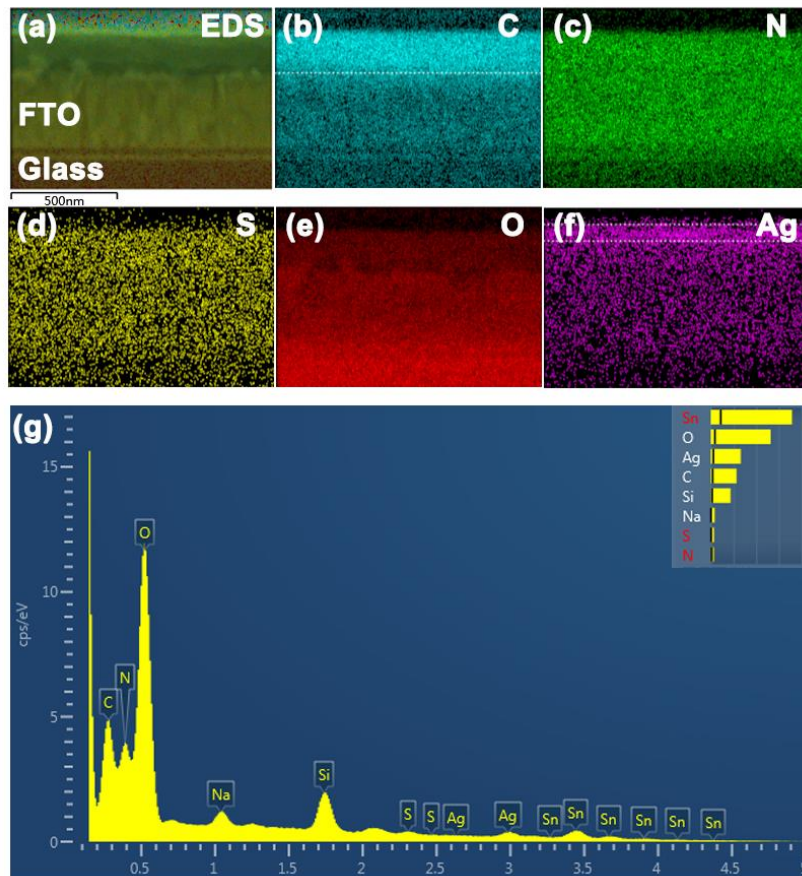

**Figure S3.** (a) Cross-section layered electronic image of the memory structure. (b)-(f) Cross-sectional mapping images of the Ag/Keratin/FTO memory device after the electrical measurements. (g) Energy dispersive spectra of the Ag/Keratin/FTO memory device.

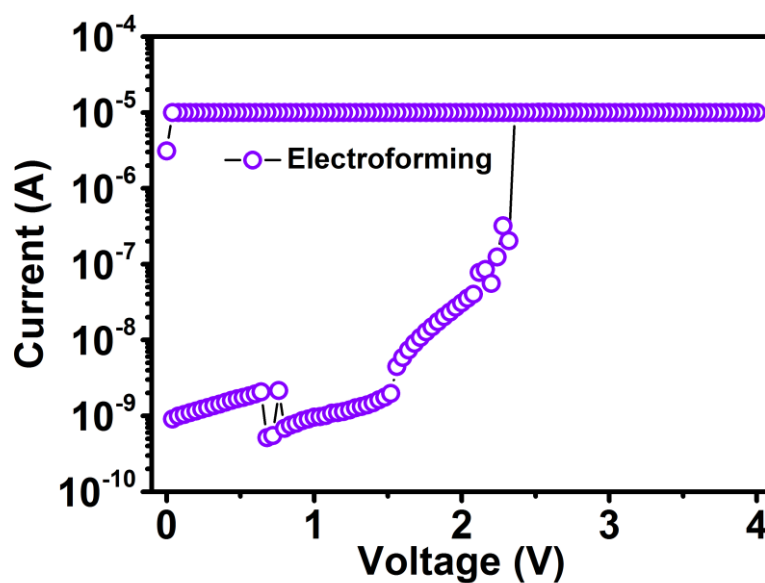

**Figure S4.** Typical I-V curves of the electroforming process of the Ag/Keratin/FTO memory device.

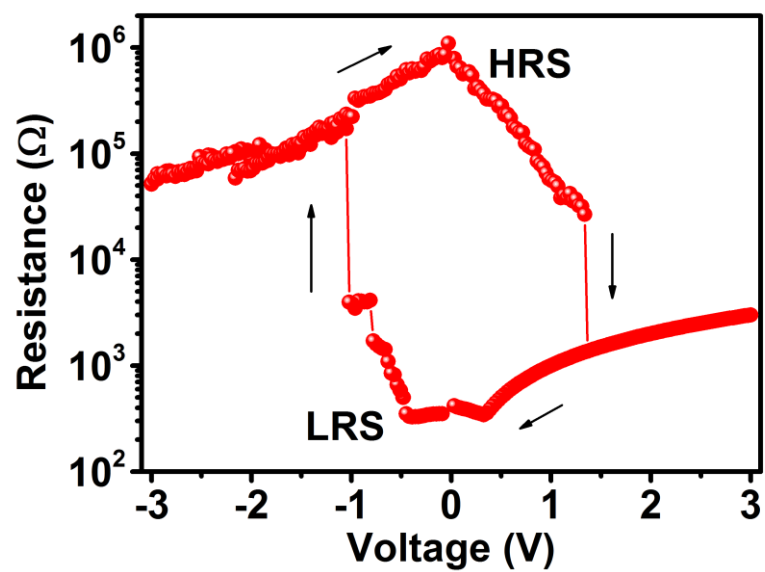

Figure S5. R-V loops at room temperatures of the Ag/Keratin/FTO memory device.

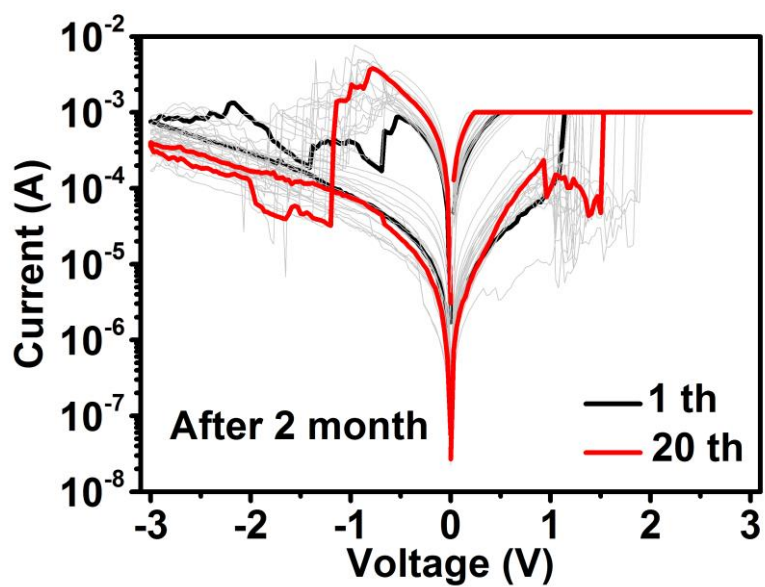

Figure S6. I-V curves of 20 successive switching cycles obtained after 2 month.

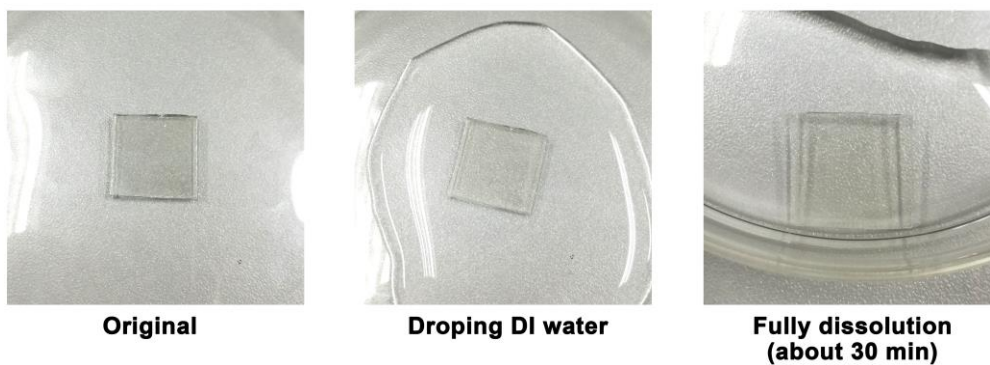

**Figure S7.** Digital photographs illustrating the time sequence of dissolution of the keratin thin films in DI water at room temperature.
